# Supplementary material for: Morphological and Molecular Characterization of Reared Parasitoid Wasps of the Genus Glyptapanteles Ashmead 1904 (Insecta: Hymenoptera: Braconidae: Microgastrinae) Associated with Lepidoptera in India
Source: PLoS One. 2016 Mar 4;11(3):e0150765. doi: 10.1371/journal.pone.0150765 (PMC4778878; doi:10.1371/journal.pone.0150765)
Supplement: S1 Table — Blastn hits for COI sequences. (XLSX) [file pone.0150765.s001.xlsx]

## Sheet: BLAST_Hits
Accession	Species Sequence Discription	Max score	Total score	Query cover	E value	Ident
HM397291.1	Glyptapanteles sp. voucher CNCH1926 cytochrome oxidase subunit 1 (COI) gene, partial cds; mitochondrial	876	876	0.98	0	0.92
HM397337.1	Glyptapanteles sp. voucher CNCH1972 cytochrome oxidase subunit 1 (COI) gene, partial cds; mitochondrial	854	854	0.98	0	0.91
HM430377.1	Glyptapanteles voucher CNCH1524 cytochrome oxidase subunit 1 (COI) gene, partial cds; mitochondrial	1048	1048	1	0	0.97
HM430380.1	Glyptapanteles voucher CNCH1532 cytochrome oxidase subunit 1 (COI) gene, partial cds; mitochondrial	859	859	1	0	0.92
JN282099.1	Glyptapanteles voucher WAM 0547 cytochrome oxidase subunit 1 (COI) gene, partial cds; mitochondrial	848	848	0.99	0	0.91
HM430423.1	Glyptapanteles voucher CNCH1589 cytochrome oxidase subunit 1 (COI) gene, partial cds; mitochondrial	854	854	1	0	0.91
HM904951.1	Glyptapanteles voucher CNCH1497 cytochrome oxidase subunit 1 (COI) gene, partial cds; mitochondrial	824	824	0.96	0	0.92
HM397081.1	Glyptapanteles voucher CNCH1706 cytochrome oxidase subunit 1 (COI) gene, partial cds; mitochondrial	843	843	0.99	0	0.91
EU398117.1	Glyptapanteles sp. Whitfield08 voucher DHJPAR0012678 COX1 gene, partial sequence; mitochondrial	843	843	0.99	0	0.91
JN282008.1	Glyptapanteles compressiventris voucher WAM 0414 cytochrome oxidase subunit 1 (COI) gene, partial cds; mitochondrial	830	830	0.99	0	0.91
HM435595.1	Glyptapanteles sp. jft01 voucher CNCH0197 cytochrome oxidase subunit 1 (COI) gene, partial cds; mitochondrial	826	826	1	0	0.91
HM397248.1	Glyptapanteles sp. voucher CNCH1882 cytochrome oxidase subunit 1 (COI) gene, partial cds; mitochondrial	837	837	1	0	0.91
HQ558921.1	Glyptapanteles sp. jft03 voucher 07PROBE-24627 cytochrome oxidase subunit 1 (COI) gene, partial cds; mitochondrial	793	793	1	0	0.91
EU398400.1	Glyptapanteles sp. Whitfield86 voucher DHJPAR0002898 COX1 gene, partial sequence; mitochondrial	815	815	0.99	0	0.91
HQ550258.1	Glyptapanteles sp. Whitfield168 voucher DHJanzen:DHJPAR0031546 cytochrome oxidase subunit 1 (COI) gene, partial cds; mitochondrial	809	809	1	0	0.91
HQ549734.1	Glyptapanteles sp. Whitfield85 voucher DHJanzen:DHJPAR0033904 cytochrome oxidase subunit 1 (COI) gene, partial cds; mitochondrial	809	809	1	0	0.91
JN282334.1	Glyptapanteles voucher WAM 0037 cytochrome oxidase subunit 1 (COI) gene, partial cds; mitochondrial	920	920	1	0	0.94
EU398342.1	Glyptapanteles sp. Whitfield48 voucher DHJPAR0012894 COX1 gene, partial sequence; mitochondrial	837	837	0.98	0	0.91
HQ566535.1	Glyptapanteles voucher BIOUG<CAN>:08WOLVES-00807 cytochrome oxidase subunit 1 (COI) gene, partial cds; mitochondrial	1103	1103	1	0	0.99
HQ925940.1	Glyptapanteles sp. voucher CAM0649 cytochrome oxidase subunit 1 (COI) gene, partial cds; mitochondrial	1059	1059	1	0	0.97
HM435398.1	Glyptapanteles voucher CNCH0488 cytochrome oxidase subunit 1 (COI) gene, partial cds; mitochondrial	1059	1059	1	0	0.97
HM435396.1	Glyptapanteles voucher CNCH0479 cytochrome oxidase subunit 1 (COI) gene, partial cds; mitochondrial	1059	1059	1	0	0.97
HM397247.1	Glyptapanteles sp. voucher CNCH1881 cytochrome oxidase subunit 1 (COI) gene, partial cds; mitochondrial	1053	1053	0.99	0	0.97
FJ414083.1	Glyptapanteles sp. jft05 voucher BIOUG<CAN>:06-PROBE-4085 cytochrome oxidase subunit 1 (COI) gene, partial cds; mitochondrial	1053	1053	1	0	0.97
JN282108.1	Glyptapanteles voucher GOU 0521 cytochrome oxidase subunit 1 (COI) gene, partial cds; mitochondrial	1031	1031	0.99	0	0.97
HQ558871.1	Glyptapanteles sp. jft04 voucher 07PROBE-24566 cytochrome oxidase subunit 1 (COI) gene, partial cds; mitochondrial	1026	1026	0.99	0	0.96
HM397251.1	Glyptapanteles sp. voucher CNCH1885 cytochrome oxidase subunit 1 (COI) gene, partial cds; mitochondrial	1026	1026	1	0	0.96
HM432849.1	Glyptapanteles sp. voucher BIOUG<CAN>:08BBHYM-0891 cytochrome oxidase subunit 1 (COI) gene, partial cds; mitochondrial	992	992	1	0	0.95
GU141222.1	Glyptapanteles sp. jft09 voucher HYM00000670.2 cytochrome oxidase subunit 1 (COI) gene, partial cds; mitochondrial	983	983	0.95	0	0.96
KJ459134.1	Glyptapanteles cf. luciana CNCHYM45387 cytochrome oxidase subunit I gene, partial cds; mitochondrial	1009	1009	0.96	0	0.97
GU141218.1	Glyptapanteles sp. jft06 voucher BIOUG<CAN>:07PROBE-22369 cytochrome oxidase subunit 1 (COI) gene, partial cds; mitochondrial	994	994	0.93	0	0.97
HM397307.1	Glyptapanteles sp. voucher CNCH1942 cytochrome oxidase subunit 1 (COI) gene, partial cds; mitochondrial	976	976	1	0	0.95
HQ549123.1	Glyptapanteles sp. Whitfield54 voucher DHJanzen:DHJPAR0038376 cytochrome oxidase subunit 1 (COI) gene, partial cds; mitochondrial	970	970	1	0	0.95
HM430679.1	Glyptapanteles voucher CAM0892 cytochrome oxidase subunit 1 (COI) gene, partial cds; mitochondrial	970	970	1	0	0.95
EU398131.1	Glyptapanteles sp. Whitfield11 voucher DHJPAR0012328 COX1 gene, partial sequence; mitochondrial	970	970	1	0	0.95
JN282036.1	Glyptapanteles liparidis voucher WAM 0445 cytochrome oxidase subunit 1 (COI) gene, partial cds; mitochondrial	965	965	1	0	0.95
HQ926567.1	Glyptapanteles sp. Whitfield54 voucher DHJanzen:DHJPAR0039959 cytochrome oxidase subunit 1 (COI) gene, partial cds; mitochondrial	953	953	1	0	0.94
HQ550180.1	Glyptapanteles sp. Whitfield98 voucher DHJanzen:DHJPAR0031438 cytochrome oxidase subunit 1 (COI) gene, partial cds; mitochondrial	953	953	1	0	0.94
HM397080.1	Glyptapanteles voucher CNCH1705 cytochrome oxidase subunit 1 (COI) gene, partial cds; mitochondrial	953	953	1	0	0.94
HQ926566.1	Glyptapanteles sp. Whitfield09 voucher DHJanzen:DHJPAR0039957 cytochrome oxidase subunit 1 (COI) gene, partial cds; mitochondrial	948	948	1	0	0.94
EU398119.1	Glyptapanteles sp. Whitfield09 voucher DHJPAR0012677 COX1 gene, partial sequence; mitochondrial	948	948	1	0	0.94
GU141221.1	Glyptapanteles sp. jft08 voucher BIOUG<CAN>:07PROBE-20280 cytochrome oxidase subunit 1 (COI) gene, partial cds; mitochondrial	953	953	0.95	0	0.94
EU398396.1	Glyptapanteles sp. Whitfield84 voucher DHJPAR0012110 COX1 gene, partial sequence; mitochondrial	976	976	1	0	0.94
EU398394.1	Glyptapanteles sp. Whitfield53 voucher DHJPAR0012892 COX1 gene, partial sequence; mitochondrial	965	965	1	0	0.94
EU398135.1	Glyptapanteles sp. Whitfield12 voucher DHJPAR0004243 COX1 gene, partial sequence; mitochondrial	959	959	1	0	0.94
GU141219.1	Glyptapanteles sp. jft07 voucher BIOUG<CAN>:07PROBE-20366 cytochrome oxidase subunit 1 (COI) gene, partial cds; mitochondrial	948	948	1	0	0.93
EU398126.1	Glyptapanteles sp. Whitfield10 voucher DHJPAR0001518 COX1 gene, partial sequence; mitochondrial	948	948	0.94	0	0.95
EU398148.1	Glyptapanteles sp. Whitfield14 voucher DHJPAR0012015 COX1 gene, partial sequence; mitochondrial	948	948	0.96	0	0.94
EU398138.1	Glyptapanteles sp. Whitfield13 voucher DHJPAR0004235 COX1 gene, partial sequence; mitochondrial	948	948	0.96	0	0.94
EU398365.1	Glyptapanteles sp. Whitfield53 voucher DHJPAR0005112 COX1 gene, partial sequence; mitochondrial	942	942	0.96	0	0.94
	S1 Table. Details of blastn hits obtained for COI sequences of Glyptapanteles spp.
